# Supplementary material
Source: publisher figshare collection journal article supplement (https://acs.figshare.com/ndownloader/files/3594588)
Supplement: Supplementary file 1 [file 3594588]

data_General
_audit_creation_date                    2012-02-13
_audit_creation_method                 'by CrystalStructure 4.0'
_audit_update_record                    ?

#==============================================================================
# PROCESSING SUMMARY (IUCr Office Use Only)

_journal_date_recd_electronic           ?
_journal_date_from_coeditor             ?
_journal_date_accepted                  ?
_journal_coeditor_code                  ?

#==============================================================================
# SUBMISSION DETAILS

_publ_contact_author_name              'ENTER NAME'
_publ_contact_author_email             'ENTER EMAIL ADDRESS'
_publ_contact_author_fax               'ENTER FAX NUMBER'
_publ_contact_author_phone             'ENTER PHONE NUMBER'
_publ_contact_letter
;
    ENTER TEXT OF LETTER
;
_publ_requested_journal                'ENTER JOURNAL NAME HERE'
_publ_requested_category               'CHOOSE FI FM FO CI CM CO or AD'
_publ_requested_coeditor_name           ?

#==============================================================================
# TITLE AND AUTHOR LIST

_publ_section_title
;
    ENTER SECTION TITLE
;
_publ_section_title_footnote
;
    ENTER FOOTNOTE TO TITLE OF PAPER
;
loop_
_publ_author_name
_publ_author_footnote
_publ_author_address
' FIRST AUTHORS NAME '
;
  FIRST AUTHORS FOOTNOTES
;
;
  FIRST AUTHORS ADDRESS
;
_publ_section_synopsis
;
    ENTER SYNOPSIS
;

#==============================================================================
# TEXT

_publ_section_abstract
;
    ENTER ABSTRACT
;
_publ_section_comment
;
    ENTER TEXT
;
_publ_section_references
;
    ENTER OTHER REFERENCES

    Rigaku (2010). CrystalStructure. Version 4.0. 
    Rigaku Corporation, Tokyo, Japan.

    Altomare, A., Cascarano, G., Giacovazzo, C., Guagliardi, A., 
    Burla, M., Polidori, G., and Camalli, M. (1994) J. Appl. Cryst., 27, 435. 
    SIR92

    Sheldrick, G.M. (2008), Acta Cryst. A64, 112-122.

    Rigaku (1998). REQAB. 
    Rigaku Corporation, Tokyo, Japan.

;
_publ_section_figure_captions
;
    ENTER FIGURE CAPTIONS
;
_publ_section_exptl_prep
;
    ENTER COMPOUND PREPARATION DETAILS
;
_publ_section_exptl_refinement
;
    ENTER SPECIAL DETAILS OF THE REFINEMENT
;

#==============================================================================
data_HYS1356

#==============================================================================
# CHEMICAL DATA

_chemical_formula_sum                  'C60 H68 Co2 N4 O6'
_chemical_formula_moiety               'C60 H68 Co2 N4 O6'
_chemical_formula_weight                1059.09
_chemical_melting_point                 ?

#==============================================================================
# CRYSTAL DATA
_symmetry_cell_setting                  monoclinic
_symmetry_space_group_name_H-M         'P 1 21/n 1'
_symmetry_space_group_name_Hall        '-P 2yn'
_symmetry_Int_Tables_number             14
loop_
_symmetry_equiv_pos_site_id
_symmetry_equiv_pos_as_xyz
1   '+X,+Y,+Z'
2   '1/2-X,1/2+Y,1/2-Z'
3   '-X,-Y,-Z'
4   '1/2+X,1/2-Y,1/2+Z'
#------------------------------------------------------------------------------
_cell_length_a                          10.416(8)
_cell_length_b                          15.759(11)
_cell_length_c                          16.874(12)
_cell_angle_alpha                       90.0000
_cell_angle_beta                        94.919(6)
_cell_angle_gamma                       90.0000
_cell_volume                            2760(4)
_cell_formula_units_Z                   2
_cell_measurement_reflns_used           4329
_cell_measurement_theta_min             3.25
_cell_measurement_theta_max             27.47
_cell_measurement_temperature           113
#------------------------------------------------------------------------------
_exptl_crystal_description              platelet
_exptl_crystal_colour                   orange
_exptl_crystal_size_max                 0.290
_exptl_crystal_size_mid                 0.060
_exptl_crystal_size_min                 0.060
_exptl_crystal_density_diffrn           1.274
_exptl_crystal_density_meas             ?
_exptl_crystal_density_method          'not measured'
_exptl_crystal_F_000                    1116.00
_exptl_absorpt_coefficient_mu           0.654
_exptl_absorpt_correction_type          multi-scan
_exptl_absorpt_process_details         'REQAB (Rigaku, 1998)'
_exptl_absorpt_correction_T_min         0.836
_exptl_absorpt_correction_T_max         0.962

#==============================================================================
# EXPERIMENTAL DATA

_diffrn_ambient_temperature             113
_diffrn_radiation_type                 'Mo K\a'
_diffrn_radiation_wavelength            0.71075
_diffrn_measurement_device_type        'Rigaku Mercury70'
_diffrn_measurement_method              \w
_diffrn_detector_area_resol_mean        7.314
_diffrn_reflns_number                   25853
_diffrn_reflns_av_R_equivalents         0.1412
_diffrn_reflns_theta_max                27.10
_diffrn_reflns_theta_full               27.10
_diffrn_measured_fraction_theta_max     0.997
_diffrn_measured_fraction_theta_full    0.997
_diffrn_reflns_limit_h_min             -13
_diffrn_reflns_limit_h_max              13
_diffrn_reflns_limit_k_min             -20
_diffrn_reflns_limit_k_max              20
_diffrn_reflns_limit_l_min             -21
_diffrn_reflns_limit_l_max              21
_diffrn_standards_number                0
_diffrn_standards_interval_count        .
_diffrn_standards_decay_%               ?

#==============================================================================
# REFINEMENT DATA

_refine_special_details
;
    Refinement was performed using all reflections. The weighted 
    R-factor (wR) and goodness of fit (S) are based on F^2^.
    R-factor (gt) are based on F. The threshold expression of
    F^2^ > 2.0 sigma(F^2^) is used only for calculating R-factor (gt).
;
_reflns_number_total                    6084
_reflns_number_gt                       3278
_reflns_threshold_expression            F^2^>2.0\s(F^2^)
_refine_ls_structure_factor_coef        Fsqd
_refine_ls_R_factor_gt                  0.0937
_refine_ls_wR_factor_ref                0.2485
_refine_ls_number_restraints            0
_refine_ls_hydrogen_treatment           constr
_refine_ls_number_reflns                6083
_refine_ls_number_parameters            325
_refine_ls_goodness_of_fit_ref          1.027
_refine_ls_weighting_scheme             calc
_refine_ls_weighting_details
           'w = 1/[\s^2^(Fo^2^)+(0.1074P)^2^+2.0073P] where P=(Fo^2^+2Fc^2^)/3'
_atom_sites_solution_hydrogens          geom
_atom_sites_solution_primary            direct
_atom_sites_solution_secondary          difmap
_refine_ls_shift/su_max                 0.000
_refine_diff_density_max                0.860
_refine_diff_density_min               -0.630
_refine_ls_extinction_method            none
_refine_ls_extinction_coef              ?

loop_
_atom_type_symbol
_atom_type_description
_atom_type_scat_dispersion_real
_atom_type_scat_dispersion_imag
_atom_type_scat_source
  'C' 'C'  0.0033 0.0016 
;
International Tables for Crystallography
(1992, Vol. C, Tables 4.2.6.8 and 6.1.1.4)
;
  'H' 'H'  0.0000 0.0000 
;
International Tables for Crystallography
(1992, Vol. C, Table 6.1.1.4)
;
  'Co' 'Co'  0.3494 0.9721 
;
International Tables for Crystallography
(1992, Vol. C, Tables 4.2.6.8 and 6.1.1.4)
;
  'N' 'N'  0.0061 0.0033 
;
International Tables for Crystallography
(1992, Vol. C, Tables 4.2.6.8 and 6.1.1.4)
;
  'O' 'O'  0.0106 0.0060 
;
International Tables for Crystallography
(1992, Vol. C, Tables 4.2.6.8 and 6.1.1.4)
;

#==============================================================================
# ATOMIC COORDINATES AND THERMAL PARAMETERS

loop_
_atom_site_label
_atom_site_type_symbol
_atom_site_fract_x
_atom_site_fract_y
_atom_site_fract_z
_atom_site_U_iso_or_equiv
_atom_site_adp_type
_atom_site_occupancy
_atom_site_symmetry_multiplicity
_atom_site_calc_flag
_atom_site_refinement_flags
_atom_site_disorder_assembly
_atom_site_disorder_group
 Co1 Co 0.86437(7) 0.04113(5) 0.00162(4) 0.0312(3) Uani 1.0 4 d . . .
 O1 O 1.0177(4) 0.0068(3) 0.0757(2) 0.0350(10) Uani 1.0 4 d . . .
 O2 O 0.8899(4) 0.1737(3) -0.0026(3) 0.0396(10) Uani 1.0 4 d . . .
 O3 O 0.7746(4) 0.1279(3) 0.0928(3) 0.0358(10) Uani 1.0 4 d . . .
 N1 N 0.6974(5) 0.0558(3) -0.0818(3) 0.0336(11) Uani 1.0 4 d . . .
 N2 N 0.7506(4) -0.0661(3) 0.0214(3) 0.0332(11) Uani 1.0 4 d . . .
 C1 C 1.0386(6) 0.0098(4) 0.1588(4) 0.0368(14) Uani 1.0 4 d . . .
 C2 C 1.1389(5) 0.0738(4) 0.1878(4) 0.0342(14) Uani 1.0 4 d . . .
 C3 C 1.2148(6) 0.0585(4) 0.2594(4) 0.0420(16) Uani 1.0 4 d . . .
 C4 C 1.3060(6) 0.1186(5) 0.2887(4) 0.0482(17) Uani 1.0 4 d . . .
 C5 C 1.3265(6) 0.1921(5) 0.2478(4) 0.0463(17) Uani 1.0 4 d . . .
 C6 C 1.2514(6) 0.2069(4) 0.1769(4) 0.0450(16) Uani 1.0 4 d . . .
 C7 C 1.1573(6) 0.1496(4) 0.1482(4) 0.0391(15) Uani 1.0 4 d . . .
 C8 C 1.4309(6) 0.2541(5) 0.2783(5) 0.064(3) Uani 1.0 4 d . . .
 C9 C 0.8273(6) 0.1884(4) 0.0580(4) 0.0340(14) Uani 1.0 4 d . . .
 C10 C 0.8125(6) 0.2804(4) 0.0848(4) 0.0413(15) Uani 1.0 4 d . . .
 C11 C 0.7742(10) 0.2827(6) 0.1687(5) 0.106(4) Uani 1.0 4 d . . .
 C12 C 0.9384(7) 0.3278(4) 0.0813(5) 0.066(3) Uani 1.0 4 d . . .
 C13 C 0.7102(9) 0.3224(5) 0.0282(7) 0.123(5) Uani 1.0 4 d . . .
 C14 C 0.6797(6) 0.1204(4) -0.1329(4) 0.0379(14) Uani 1.0 4 d . . .
 C15 C 0.5713(6) 0.1262(5) -0.1863(4) 0.0521(18) Uani 1.0 4 d . . .
 C16 C 0.4767(6) 0.0633(5) -0.1859(4) 0.0483(17) Uani 1.0 4 d . . .
 C17 C 0.4961(6) -0.0026(5) -0.1330(4) 0.0403(15) Uani 1.0 4 d . . .
 C18 C 0.6073(5) -0.0051(4) -0.0818(4) 0.0320(13) Uani 1.0 4 d . . .
 C19 C 0.6378(5) -0.0760(4) -0.0239(4) 0.0354(14) Uani 1.0 4 d . . .
 C20 C 0.5575(6) -0.1455(4) -0.0171(4) 0.0376(14) Uani 1.0 4 d . . .
 C21 C 0.5994(6) -0.2076(4) 0.0364(4) 0.0492(17) Uani 1.0 4 d . . .
 C22 C 0.7160(6) -0.2016(4) 0.0808(4) 0.0433(16) Uani 1.0 4 d . . .
 C23 C 0.7892(6) -0.1275(4) 0.0717(4) 0.0374(14) Uani 1.0 4 d . . .
 C24 C 0.7757(7) 0.0678(4) 0.4623(4) 0.0436(16) Uani 1.0 4 d . . .
 C25 C 0.8907(6) 0.0735(4) 0.4261(4) 0.0404(15) Uani 1.0 4 d . . .
 C26 C 0.8914(7) 0.0819(5) 0.3448(4) 0.0504(17) Uani 1.0 4 d . . .
 C27 C 0.7747(7) 0.0851(5) 0.2976(4) 0.0498(17) Uani 1.0 4 d . . .
 C28 C 0.6605(7) 0.0782(5) 0.3335(4) 0.0505(18) Uani 1.0 4 d . . .
 C29 C 0.6604(7) 0.0697(4) 0.4139(4) 0.0484(17) Uani 1.0 4 d . . .
 C30 C 0.7750(8) 0.0592(5) 0.5510(4) 0.067(3) Uani 1.0 4 d . . .
 H1A H 1.0659 -0.0470 0.1788 0.0441 Uiso 1.0 4 calc R . .
 H1B H 0.9564 0.0239 0.1812 0.0441 Uiso 1.0 4 calc R . .
 H3 H 1.2043 0.0073 0.2879 0.0504 Uiso 1.0 4 calc R . .
 H4 H 1.3547 0.1084 0.3380 0.0578 Uiso 1.0 4 calc R . .
 H6 H 1.2647 0.2571 0.1476 0.0540 Uiso 1.0 4 calc R . .
 H7 H 1.1048 0.1624 0.1009 0.0469 Uiso 1.0 4 calc R . .
 H8A H 1.5148 0.2255 0.2818 0.0767 Uiso 1.0 4 calc R . .
 H8B H 1.4130 0.2744 0.3312 0.0767 Uiso 1.0 4 calc R . .
 H8C H 1.4322 0.3023 0.2417 0.0767 Uiso 1.0 4 calc R . .
 H11A H 0.8406 0.2547 0.2042 0.1266 Uiso 1.0 4 calc R . .
 H11B H 0.6919 0.2532 0.1713 0.1266 Uiso 1.0 4 calc R . .
 H11C H 0.7652 0.3418 0.1854 0.1266 Uiso 1.0 4 calc R . .
 H12A H 0.9638 0.3267 0.0267 0.0797 Uiso 1.0 4 calc R . .
 H12B H 1.0054 0.3006 0.1169 0.0797 Uiso 1.0 4 calc R . .
 H12C H 0.9274 0.3867 0.0979 0.0797 Uiso 1.0 4 calc R . .
 H13A H 0.6283 0.2922 0.0302 0.1474 Uiso 1.0 4 calc R . .
 H13B H 0.7369 0.3205 -0.0260 0.1474 Uiso 1.0 4 calc R . .
 H13C H 0.6995 0.3816 0.0441 0.1474 Uiso 1.0 4 calc R . .
 H14 H 0.7433 0.1636 -0.1327 0.0454 Uiso 1.0 4 calc R . .
 H15 H 0.5613 0.1722 -0.2226 0.0625 Uiso 1.0 4 calc R . .
 H16 H 0.4009 0.0661 -0.2214 0.0579 Uiso 1.0 4 calc R . .
 H17 H 0.4335 -0.0462 -0.1315 0.0483 Uiso 1.0 4 calc R . .
 H20 H 0.4772 -0.1500 -0.0481 0.0451 Uiso 1.0 4 calc R . .
 H21 H 0.5464 -0.2558 0.0427 0.0591 Uiso 1.0 4 calc R . .
 H22 H 0.7461 -0.2455 0.1162 0.0519 Uiso 1.0 4 calc R . .
 H23 H 0.8691 -0.1213 0.1028 0.0448 Uiso 1.0 4 calc R . .
 H25 H 0.9702 0.0716 0.4581 0.0485 Uiso 1.0 4 calc R . .
 H26 H 0.9707 0.0855 0.3211 0.0604 Uiso 1.0 4 calc R . .
 H27 H 0.7737 0.0919 0.2416 0.0597 Uiso 1.0 4 calc R . .
 H28 H 0.5808 0.0795 0.3016 0.0606 Uiso 1.0 4 calc R . .
 H29 H 0.5809 0.0648 0.4372 0.0581 Uiso 1.0 4 calc R . .
 H30A H 0.7330 0.0058 0.5636 0.0802 Uiso 1.0 4 calc R . .
 H30B H 0.7277 0.1069 0.5719 0.0802 Uiso 1.0 4 calc R . .
 H30C H 0.8638 0.0594 0.5754 0.0802 Uiso 1.0 4 calc R . .


loop_
_atom_site_aniso_label
_atom_site_aniso_U_11
_atom_site_aniso_U_22
_atom_site_aniso_U_33
_atom_site_aniso_U_12
_atom_site_aniso_U_13
_atom_site_aniso_U_23
 Co1 0.0202(4) 0.0366(5) 0.0367(5) -0.0008(4) 0.0028(3) -0.0006(4)
 O1 0.026(2) 0.044(3) 0.035(3) 0.0005(18) 0.0016(17) -0.0030(18)
 O2 0.037(3) 0.034(3) 0.049(3) 0.0010(18) 0.007(2) 0.0027(19)
 O3 0.029(3) 0.036(3) 0.042(3) -0.0013(18) 0.0034(18) 0.0017(19)
 N1 0.026(3) 0.043(3) 0.033(3) 0.001(3) 0.008(2) -0.002(3)
 N2 0.020(3) 0.041(3) 0.038(3) 0.000(2) 0.004(2) -0.006(3)
 C1 0.027(3) 0.051(4) 0.032(4) 0.001(3) 0.002(3) -0.001(3)
 C2 0.023(3) 0.047(4) 0.033(4) 0.000(3) 0.004(3) -0.007(3)
 C3 0.031(4) 0.060(5) 0.035(4) -0.005(3) 0.005(3) -0.001(3)
 C4 0.024(4) 0.078(6) 0.042(4) -0.002(4) 0.002(3) -0.011(4)
 C5 0.027(4) 0.054(5) 0.058(5) 0.001(3) 0.003(3) -0.020(4)
 C6 0.029(4) 0.044(4) 0.062(5) -0.004(3) 0.007(3) -0.015(4)
 C7 0.031(4) 0.039(4) 0.048(4) 0.002(3) -0.001(3) -0.009(3)
 C8 0.026(4) 0.065(5) 0.101(6) -0.002(4) 0.004(4) -0.027(5)
 C9 0.023(3) 0.041(4) 0.036(4) 0.002(3) -0.011(3) 0.001(3)
 C10 0.026(4) 0.037(4) 0.061(5) 0.001(3) 0.001(3) -0.006(3)
 C11 0.155(10) 0.071(6) 0.100(7) -0.039(6) 0.071(7) -0.051(6)
 C12 0.039(4) 0.036(4) 0.123(7) 0.004(4) 0.001(5) -0.021(4)
 C13 0.095(8) 0.043(5) 0.212(12) 0.025(5) -0.098(8) -0.033(6)
 C14 0.033(4) 0.041(4) 0.041(4) 0.001(3) 0.010(3) 0.009(3)
 C15 0.036(4) 0.063(5) 0.056(5) 0.006(4) -0.005(4) 0.011(4)
 C16 0.030(4) 0.066(5) 0.047(4) 0.005(4) -0.011(3) 0.001(4)
 C17 0.024(3) 0.052(4) 0.045(4) 0.002(3) 0.002(3) -0.009(4)
 C18 0.022(3) 0.040(4) 0.035(4) 0.002(3) 0.006(3) -0.006(3)
 C19 0.021(3) 0.039(4) 0.046(4) -0.001(3) 0.003(3) -0.009(3)
 C20 0.030(4) 0.041(4) 0.041(4) -0.008(3) -0.003(3) -0.006(3)
 C21 0.027(4) 0.042(4) 0.078(5) -0.010(3) -0.004(4) 0.004(4)
 C22 0.041(4) 0.033(4) 0.055(4) -0.006(3) 0.002(3) 0.010(3)
 C23 0.021(3) 0.047(4) 0.043(4) -0.001(3) -0.002(3) 0.004(3)
 C24 0.052(5) 0.043(4) 0.035(4) 0.003(3) 0.001(3) -0.003(3)
 C25 0.033(4) 0.041(4) 0.046(4) 0.007(3) 0.001(3) -0.006(3)
 C26 0.044(4) 0.055(5) 0.054(5) 0.003(4) 0.012(4) -0.001(4)
 C27 0.050(5) 0.059(5) 0.041(4) 0.007(4) 0.005(4) -0.008(4)
 C28 0.037(4) 0.062(5) 0.053(5) 0.005(4) 0.001(3) -0.012(4)
 C29 0.044(4) 0.042(4) 0.061(5) 0.000(3) 0.019(4) -0.002(4)
 C30 0.081(6) 0.073(6) 0.048(5) 0.006(5) 0.013(4) -0.006(4)

#==============================================================================
_computing_data_collection             'CrystalClear (Rigaku Inc., 2007)'
_computing_cell_refinement              CrystalClear
_computing_data_reduction               CrystalClear
_computing_structure_solution          'SIR92 (Altomare, et al., 1994)'
_computing_structure_refinement        'SHELXL97 (Sheldrick, 2008)'
_computing_publication_material        'CrystalStructure 4.0 (Rigaku, 2010)'
_computing_molecular_graphics          'CrystalStructure 4.0'

#==============================================================================
# MOLECULAR GEOMETRY

_geom_special_details
;
    ENTER SPECIAL DETAILS OF THE MOLECULAR GEOMETRY
;

loop_
_geom_bond_atom_site_label_1
_geom_bond_atom_site_label_2
_geom_bond_distance
_geom_bond_publ_flag
_geom_bond_site_symmetry_1
_geom_bond_site_symmetry_2
Co1 O1 2.016(4) yes . .
Co1 O1 2.014(4) yes . 3_755
Co1 O2 2.108(5) yes . .
Co1 N1 2.154(5) yes . .
Co1 N2 2.107(5) yes . .
O1 C1 1.402(7) yes . .
O2 C9 1.281(8) yes . .
O3 C9 1.270(7) yes . .
N1 C14 1.338(8) yes . .
N1 C18 1.342(8) yes . .
N2 C19 1.355(7) yes . .
N2 C23 1.327(8) yes . .
C1 C2 1.503(8) yes . .
C2 C3 1.407(8) yes . .
C2 C7 1.390(9) yes . .
C3 C4 1.402(9) yes . .
C4 C5 1.374(10) yes . .
C5 C6 1.391(9) yes . .
C5 C8 1.519(10) yes . .
C6 C7 1.388(9) yes . .
C9 C10 1.530(9) yes . .
C10 C11 1.504(11) yes . .
C10 C12 1.515(9) yes . .
C10 C13 1.521(11) yes . .
C14 C15 1.386(9) yes . .
C15 C16 1.397(10) yes . .
C16 C17 1.373(10) yes . .
C17 C18 1.385(8) yes . .
C18 C19 1.500(8) yes . .
C19 C20 1.389(9) yes . .
C20 C21 1.377(9) yes . .
C21 C22 1.375(9) yes . .
C22 C23 1.409(9) yes . .
C24 C25 1.393(10) yes . .
C24 C29 1.393(9) yes . .
C24 C30 1.504(10) yes . .
C25 C26 1.379(10) yes . .
C26 C27 1.396(9) yes . .
C27 C28 1.385(10) yes . .
C28 C29 1.364(10) yes . .
C1 H1A 0.990 no . .
C1 H1B 0.990 no . .
C3 H3 0.950 no . .
C4 H4 0.950 no . .
C6 H6 0.950 no . .
C7 H7 0.950 no . .
C8 H8A 0.980 no . .
C8 H8B 0.980 no . .
C8 H8C 0.980 no . .
C11 H11A 0.980 no . .
C11 H11B 0.980 no . .
C11 H11C 0.980 no . .
C12 H12A 0.980 no . .
C12 H12B 0.980 no . .
C12 H12C 0.980 no . .
C13 H13A 0.980 no . .
C13 H13B 0.980 no . .
C13 H13C 0.980 no . .
C14 H14 0.950 no . .
C15 H15 0.950 no . .
C16 H16 0.950 no . .
C17 H17 0.950 no . .
C20 H20 0.950 no . .
C21 H21 0.950 no . .
C22 H22 0.950 no . .
C23 H23 0.950 no . .
C25 H25 0.950 no . .
C26 H26 0.950 no . .
C27 H27 0.950 no . .
C28 H28 0.950 no . .
C29 H29 0.950 no . .
C30 H30A 0.980 no . .
C30 H30B 0.980 no . .
C30 H30C 0.980 no . .

loop_
_geom_angle_atom_site_label_1
_geom_angle_atom_site_label_2
_geom_angle_atom_site_label_3
_geom_angle
_geom_angle_publ_flag
_geom_angle_site_symmetry_1
_geom_angle_site_symmetry_2
_geom_angle_site_symmetry_3
O1 Co1 O1 78.83(16) yes . . 3_755
O1 Co1 O2 101.04(16) yes . . .
O1 Co1 N1 170.54(18) yes . . .
O1 Co1 N2 96.48(17) yes . . .
O1 Co1 O2 105.30(16) yes 3_755 . .
O1 Co1 N1 96.92(17) yes 3_755 . .
O1 Co1 N2 100.62(18) yes 3_755 . .
O2 Co1 N1 88.21(17) yes . . .
O2 Co1 N2 151.01(17) yes . . .
N1 Co1 N2 75.86(18) yes . . .
Co1 O1 Co1 101.17(17) yes . . 3_755
Co1 O1 C1 131.2(4) yes . . .
Co1 O1 C1 127.6(4) yes 3_755 . .
Co1 O2 C9 94.5(4) yes . . .
Co1 N1 C14 124.2(4) yes . . .
Co1 N1 C18 116.7(4) yes . . .
C14 N1 C18 119.1(5) yes . . .
Co1 N2 C19 118.4(4) yes . . .
Co1 N2 C23 122.9(4) yes . . .
C19 N2 C23 118.6(5) yes . . .
O1 C1 C2 113.1(5) yes . . .
C1 C2 C3 119.2(6) yes . . .
C1 C2 C7 122.7(5) yes . . .
C3 C2 C7 118.0(6) yes . . .
C2 C3 C4 120.0(6) yes . . .
C3 C4 C5 121.5(6) yes . . .
C4 C5 C6 118.3(6) yes . . .
C4 C5 C8 120.6(6) yes . . .
C6 C5 C8 121.2(6) yes . . .
C5 C6 C7 121.2(6) yes . . .
C2 C7 C6 120.9(6) yes . . .
O2 C9 O3 120.2(6) yes . . .
O2 C9 C10 118.7(5) yes . . .
O3 C9 C10 121.1(6) yes . . .
C9 C10 C11 110.1(6) yes . . .
C9 C10 C12 110.2(5) yes . . .
C9 C10 C13 108.0(6) yes . . .
C11 C10 C12 109.0(6) yes . . .
C11 C10 C13 110.6(7) yes . . .
C12 C10 C13 108.8(6) yes . . .
N1 C14 C15 121.9(6) yes . . .
C14 C15 C16 119.1(6) yes . . .
C15 C16 C17 118.3(6) yes . . .
C16 C17 C18 119.7(6) yes . . .
N1 C18 C17 121.8(6) yes . . .
N1 C18 C19 115.0(5) yes . . .
C17 C18 C19 123.2(6) yes . . .
N2 C19 C18 114.0(5) yes . . .
N2 C19 C20 122.9(6) yes . . .
C18 C19 C20 123.0(5) yes . . .
C19 C20 C21 117.1(6) yes . . .
C20 C21 C22 121.6(6) yes . . .
C21 C22 C23 117.3(6) yes . . .
N2 C23 C22 122.4(5) yes . . .
C25 C24 C29 118.2(6) yes . . .
C25 C24 C30 121.3(6) yes . . .
C29 C24 C30 120.5(7) yes . . .
C24 C25 C26 121.4(6) yes . . .
C25 C26 C27 119.5(7) yes . . .
C26 C27 C28 119.1(7) yes . . .
C27 C28 C29 121.1(6) yes . . .
C24 C29 C28 120.7(7) yes . . .
O1 C1 H1A 108.954 no . . .
O1 C1 H1B 108.952 no . . .
C2 C1 H1A 108.950 no . . .
C2 C1 H1B 108.951 no . . .
H1A C1 H1B 107.769 no . . .
C2 C3 H3 119.971 no . . .
C4 C3 H3 119.980 no . . .
C3 C4 H4 119.275 no . . .
C5 C4 H4 119.274 no . . .
C5 C6 H6 119.376 no . . .
C7 C6 H6 119.382 no . . .
C2 C7 H7 119.559 no . . .
C6 C7 H7 119.551 no . . .
C5 C8 H8A 109.475 no . . .
C5 C8 H8B 109.477 no . . .
C5 C8 H8C 109.473 no . . .
H8A C8 H8B 109.467 no . . .
H8A C8 H8C 109.468 no . . .
H8B C8 H8C 109.468 no . . .
C10 C11 H11A 109.477 no . . .
C10 C11 H11B 109.473 no . . .
C10 C11 H11C 109.472 no . . .
H11A C11 H11B 109.467 no . . .
H11A C11 H11C 109.468 no . . .
H11B C11 H11C 109.471 no . . .
C10 C12 H12A 109.466 no . . .
C10 C12 H12B 109.470 no . . .
C10 C12 H12C 109.472 no . . .
H12A C12 H12B 109.471 no . . .
H12A C12 H12C 109.471 no . . .
H12B C12 H12C 109.479 no . . .
C10 C13 H13A 109.474 no . . .
C10 C13 H13B 109.467 no . . .
C10 C13 H13C 109.470 no . . .
H13A C13 H13B 109.469 no . . .
H13A C13 H13C 109.472 no . . .
H13B C13 H13C 109.476 no . . .
N1 C14 H14 119.050 no . . .
C15 C14 H14 119.047 no . . .
C14 C15 H15 120.451 no . . .
C16 C15 H15 120.457 no . . .
C15 C16 H16 120.833 no . . .
C17 C16 H16 120.823 no . . .
C16 C17 H17 120.125 no . . .
C18 C17 H17 120.133 no . . .
C19 C20 H20 121.460 no . . .
C21 C20 H20 121.463 no . . .
C20 C21 H21 119.205 no . . .
C22 C21 H21 119.215 no . . .
C21 C22 H22 121.349 no . . .
C23 C22 H22 121.327 no . . .
N2 C23 H23 118.783 no . . .
C22 C23 H23 118.793 no . . .
C24 C25 H25 119.308 no . . .
C26 C25 H25 119.310 no . . .
C25 C26 H26 120.250 no . . .
C27 C26 H26 120.242 no . . .
C26 C27 H27 120.460 no . . .
C28 C27 H27 120.457 no . . .
C27 C28 H28 119.438 no . . .
C29 C28 H28 119.436 no . . .
C24 C29 H29 119.623 no . . .
C28 C29 H29 119.650 no . . .
C24 C30 H30A 109.466 no . . .
C24 C30 H30B 109.475 no . . .
C24 C30 H30C 109.466 no . . .
H30A C30 H30B 109.470 no . . .
H30A C30 H30C 109.473 no . . .
H30B C30 H30C 109.477 no . . .

loop_
_geom_torsion_atom_site_label_1
_geom_torsion_atom_site_label_2
_geom_torsion_atom_site_label_3
_geom_torsion_atom_site_label_4
_geom_torsion
_geom_torsion_publ_flag
_geom_torsion_site_symmetry_1
_geom_torsion_site_symmetry_2
_geom_torsion_site_symmetry_3
_geom_torsion_site_symmetry_4
O1 Co1 O1 Co1 0.00(16) no . . 3_755 3_755
O1 Co1 O1 C1 -177.1(4) no . . 3_755 3_755
O1 Co1 O1 Co1 -0.00(17) no 3_755 . . 3_755
O1 Co1 O1 C1 -176.9(4) no 3_755 . . .
O1 Co1 O2 C9 -88.2(3) no . . . .
O2 Co1 O1 Co1 -103.62(18) no . . . 3_755
O2 Co1 O1 C1 79.5(4) no . . . .
O1 Co1 N2 C19 -173.3(3) no . . . .
O1 Co1 N2 C23 1.4(4) no . . . .
N2 Co1 O1 Co1 99.59(19) no . . . 3_755
N2 Co1 O1 C1 -77.3(4) no . . . .
O1 Co1 O2 C9 -169.46(18) no 3_755 . . .
O2 Co1 O1 Co1 98.53(18) no . . 3_755 3_755
O2 Co1 O1 C1 -78.5(3) no . . 3_755 3_755
O1 Co1 N1 C14 -80.0(4) no 3_755 . . .
O1 Co1 N1 C18 99.2(3) no 3_755 . . .
N1 Co1 O1 Co1 -171.44(18) no . . 3_755 3_755
N1 Co1 O1 C1 11.5(4) no . . 3_755 3_755
O1 Co1 N2 C19 -93.5(4) no 3_755 . . .
O1 Co1 N2 C23 81.2(4) no 3_755 . . .
N2 Co1 O1 Co1 -94.59(19) no . . 3_755 3_755
N2 Co1 O1 C1 88.3(4) no . . 3_755 3_755
O2 Co1 N1 C14 25.2(4) no . . . .
O2 Co1 N1 C18 -155.6(3) no . . . .
N1 Co1 O2 C9 93.8(3) no . . . .
O2 Co1 N2 C19 59.7(5) no . . . .
O2 Co1 N2 C23 -125.7(4) no . . . .
N2 Co1 O2 C9 37.9(5) no . . . .
N1 Co1 N2 C19 1.1(3) no . . . .
N1 Co1 N2 C23 175.7(4) no . . . .
N2 Co1 N1 C14 -179.3(4) no . . . .
N2 Co1 N1 C18 -0.0(3) no . . . .
Co1 O1 C1 C2 -111.6(5) no . . . .
Co1 O1 C1 C2 72.2(6) no 3_755 . . .
Co1 O2 C9 O3 -2.6(5) no . . . .
Co1 O2 C9 C10 -179.8(4) no . . . .
Co1 N1 C14 C15 179.0(4) no . . . .
Co1 N1 C18 C17 -179.8(4) no . . . .
Co1 N1 C18 C19 -0.9(6) no . . . .
C14 N1 C18 C17 -0.5(8) no . . . .
C14 N1 C18 C19 178.4(5) no . . . .
C18 N1 C14 C15 -0.3(8) no . . . .
Co1 N2 C19 C18 -1.9(6) no . . . .
Co1 N2 C19 C20 178.2(4) no . . . .
Co1 N2 C23 C22 -175.8(4) no . . . .
C19 N2 C23 C22 -1.2(8) no . . . .
C23 N2 C19 C18 -176.7(5) no . . . .
C23 N2 C19 C20 3.3(8) no . . . .
O1 C1 C2 C3 -149.2(5) no . . . .
O1 C1 C2 C7 33.1(8) no . . . .
C1 C2 C3 C4 -178.0(5) no . . . .
C1 C2 C7 C6 -179.8(5) no . . . .
C3 C2 C7 C6 2.5(9) no . . . .
C7 C2 C3 C4 -0.1(9) no . . . .
C2 C3 C4 C5 -2.1(9) no . . . .
C3 C4 C5 C6 1.9(10) no . . . .
C3 C4 C5 C8 -176.6(6) no . . . .
C4 C5 C6 C7 0.5(10) no . . . .
C8 C5 C6 C7 179.0(6) no . . . .
C5 C6 C7 C2 -2.7(9) no . . . .
O2 C9 C10 C11 -162.5(5) no . . . .
O2 C9 C10 C12 -42.2(7) no . . . .
O2 C9 C10 C13 76.6(6) no . . . .
O3 C9 C10 C11 20.3(7) no . . . .
O3 C9 C10 C12 140.6(5) no . . . .
O3 C9 C10 C13 -100.6(6) no . . . .
N1 C14 C15 C16 0.9(9) no . . . .
C14 C15 C16 C17 -0.8(10) no . . . .
C15 C16 C17 C18 0.1(9) no . . . .
C16 C17 C18 N1 0.6(9) no . . . .
C16 C17 C18 C19 -178.2(5) no . . . .
N1 C18 C19 N2 1.8(7) no . . . .
N1 C18 C19 C20 -178.3(5) no . . . .
C17 C18 C19 N2 -179.4(5) no . . . .
C17 C18 C19 C20 0.6(9) no . . . .
N2 C19 C20 C21 -2.5(9) no . . . .
C18 C19 C20 C21 177.6(5) no . . . .
C19 C20 C21 C22 -0.5(9) no . . . .
C20 C21 C22 C23 2.4(10) no . . . .
C21 C22 C23 N2 -1.6(9) no . . . .
C25 C24 C29 C28 -1.1(9) no . . . .
C29 C24 C25 C26 0.9(9) no . . . .
C30 C24 C25 C26 -179.6(6) no . . . .
C30 C24 C29 C28 179.4(6) no . . . .
C24 C25 C26 C27 0.2(10) no . . . .
C25 C26 C27 C28 -1.1(10) no . . . .
C26 C27 C28 C29 0.9(10) no . . . .
C27 C28 C29 C24 0.2(10) no . . . .

loop_
_geom_contact_atom_site_label_1
_geom_contact_atom_site_label_2
_geom_contact_distance
_geom_contact_publ_flag
_geom_contact_site_symmetry_1
_geom_contact_site_symmetry_2
Co1 O3 2.315(4) no . .
O1 O3 3.203(6) no . .
O1 C7 2.894(7) no . .
O1 C9 3.480(7) no . .
O1 C23 3.181(7) no . .
O2 C12 2.835(8) no . .
O2 C13 3.072(10) no . .
O2 C14 3.083(7) no . .
O3 N1 3.195(6) no . .
O3 N2 3.288(7) no . .
O3 C1 3.426(7) no . .
O3 C11 2.756(10) no . .
O3 C12 3.596(8) no . .
O3 C13 3.303(9) no . .
N1 C1 3.307(8) no . 3_755
N1 C2 3.288(8) no . 3_755
N1 C9 3.349(8) no . .
N1 C16 2.773(8) no . .
N2 C7 3.364(8) no . 3_755
N2 C21 2.754(8) no . .
C1 C23 3.597(8) no . .
C2 C5 2.824(9) no . .
C2 C18 3.489(8) no . 3_755
C3 C6 2.764(10) no . .
C4 C7 2.762(9) no . .
C6 C19 3.574(9) no . 3_755
C7 C18 3.595(9) no . 3_755
C7 C19 3.328(9) no . 3_755
C14 C17 2.723(9) no . .
C15 C18 2.723(9) no . .
C17 C20 3.015(9) no . .
C19 C22 2.730(9) no . .
C20 C23 2.745(8) no . .
C24 C27 2.792(10) no . .
C25 C28 2.748(9) no . .
C26 C29 2.769(10) no . .
O3 C17 3.555(8) no . 3_655
O3 C20 3.593(7) no . 3_655
O3 C27 3.520(8) no . .
N1 C20 3.548(8) no . 3_655
N2 C17 3.486(8) no . 3_655
C15 C21 3.461(10) no . 3_655
C16 C21 3.537(10) no . 3_655
C16 C22 3.540(10) no . 3_655
C16 C28 3.551(10) no . 3_655
C17 O3 3.555(8) no . 3_655
C17 N2 3.486(8) no . 3_655
C17 C19 3.334(9) no . 3_655
C17 C20 3.524(9) no . 3_655
C18 C19 3.480(9) no . 3_655
C18 C20 3.444(9) no . 3_655
C19 C17 3.334(9) no . 3_655
C19 C18 3.480(9) no . 3_655
C20 O3 3.593(7) no . 3_655
C20 N1 3.548(8) no . 3_655
C20 C17 3.524(9) no . 3_655
C20 C18 3.444(9) no . 3_655
C21 C15 3.461(10) no . 3_655
C21 C16 3.537(10) no . 3_655
C21 C25 3.507(10) no . 2_645
C22 C16 3.540(10) no . 3_655
C25 C21 3.507(10) no . 2_655
C27 O3 3.520(8) no . .
C28 C16 3.551(10) no . 3_655
Co1 H1A 3.1903 no . 3_755
Co1 H1B 3.1116 no . .
Co1 H7 3.4659 no . .
Co1 H14 3.1559 no . .
Co1 H23 3.0753 no . .
O1 H7 2.6367 no . .
O1 H23 2.6080 no . .
O2 H7 2.7244 no . .
O2 H12A 2.5669 no . .
O2 H12B 3.0168 no . .
O2 H13A 3.3888 no . .
O2 H13B 2.8177 no . .
O2 H14 2.5684 no . .
O2 H23 3.2509 no . 3_755
O3 H1B 2.8313 no . .
O3 H7 3.4733 no . .
O3 H11A 2.7886 no . .
O3 H11B 2.5665 no . .
O3 H13A 3.1419 no . .
N1 H1A 3.0773 no . 3_755
N1 H15 3.2321 no . .
N1 H17 3.2326 no . .
N2 H1B 3.5904 no . .
N2 H7 3.0603 no . 3_755
N2 H20 3.2652 no . .
N2 H22 3.2508 no . .
C1 H3 2.6605 no . .
C1 H7 2.7069 no . .
C1 H23 2.8274 no . .
C2 H4 3.2858 no . .
C2 H6 3.2670 no . .
C3 H1A 2.5801 no . .
C3 H1B 2.9447 no . .
C3 H7 3.2592 no . .
C4 H6 3.2314 no . .
C4 H8A 2.7601 no . .
C4 H8B 2.7651 no . .
C4 H8C 3.3030 no . .
C5 H3 3.2717 no . .
C5 H7 3.2726 no . .
C6 H4 3.2332 no . .
C6 H8A 3.1488 no . .
C6 H8B 3.1608 no . .
C6 H8C 2.5793 no . .
C6 H12B 3.0535 no . .
C7 H1A 3.2947 no . .
C7 H1B 2.9687 no . .
C7 H3 3.2595 no . .
C7 H12B 2.8810 no . .
C8 H4 2.6548 no . .
C8 H6 2.6851 no . .
C9 H1B 3.5183 no . .
C9 H7 2.9471 no . .
C9 H11A 2.6712 no . .
C9 H11B 2.6731 no . .
C9 H11C 3.3351 no . .
C9 H12A 2.6793 no . .
C9 H12B 2.6902 no . .
C9 H12C 3.3446 no . .
C9 H13A 2.6512 no . .
C9 H13B 2.6453 no . .
C9 H13C 3.3233 no . .
C9 H14 3.2848 no . .
C10 H7 3.5573 no . .
C11 H12A 3.3074 no . .
C11 H12B 2.6469 no . .
C11 H12C 2.6438 no . .
C11 H13A 2.6818 no . .
C11 H13B 3.3296 no . .
C11 H13C 2.6790 no . .
C12 H7 3.1316 no . .
C12 H11A 2.6515 no . .
C12 H11B 3.3095 no . .
C12 H11C 2.6338 no . .
C12 H13A 3.3192 no . .
C12 H13B 2.6543 no . .
C12 H13C 2.6532 no . .
C13 H11A 3.3328 no . .
C13 H11B 2.6706 no . .
C13 H11C 2.6823 no . .
C13 H12A 2.6452 no . .
C13 H12B 3.3203 no . .
C13 H12C 2.6595 no . .
C14 H1A 3.0509 no . 3_755
C14 H3 3.5896 no . 3_755
C14 H16 3.2633 no . .
C15 H17 3.2440 no . .
C16 H14 3.2542 no . .
C17 H15 3.2424 no . .
C17 H20 2.7451 no . .
C18 H14 3.1663 no . .
C18 H16 3.2495 no . .
C18 H20 2.7390 no . .
C19 H7 3.3669 no . 3_755
C19 H17 2.7174 no . .
C19 H21 3.2222 no . .
C19 H23 3.1632 no . .
C20 H6 3.4749 no . 3_755
C20 H17 2.7224 no . .
C20 H22 3.2634 no . .
C21 H23 3.2344 no . .
C22 H20 3.2640 no . .
C23 H1A 3.5051 no . .
C23 H1B 3.4040 no . .
C23 H7 3.2500 no . 3_755
C23 H21 3.2420 no . .
C24 H26 3.2727 no . .
C24 H28 3.2504 no . .
C25 H27 3.2572 no . .
C25 H29 3.2510 no . .
C25 H30A 3.1414 no . .
C25 H30B 3.1502 no . .
C25 H30C 2.5686 no . .
C26 H28 3.2545 no . .
C27 H25 3.2528 no . .
C27 H29 3.2476 no . .
C28 H26 3.2578 no . .
C29 H25 3.2490 no . .
C29 H27 3.2494 no . .
C29 H30A 2.7629 no . .
C29 H30B 2.7597 no . .
C29 H30C 3.3092 no . .
C30 H25 2.6792 no . .
C30 H29 2.6677 no . .
H1A H3 2.3965 no . .
H1A H7 3.5876 no . .
H1A H14 2.8623 no . 3_755
H1A H23 2.6010 no . .
H1B H3 3.0291 no . .
H1B H7 3.0579 no . .
H1B H23 2.7579 no . .
H3 H4 2.3416 no . .
H4 H8A 2.7112 no . .
H4 H8B 2.6906 no . .
H4 H8C 3.5845 no . .
H6 H7 2.3232 no . .
H6 H8A 3.3395 no . .
H6 H8B 3.3515 no . .
H6 H8C 2.3663 no . .
H6 H12B 2.7909 no . .
H7 H12A 3.1801 no . .
H7 H12B 2.4360 no . .
H7 H23 3.5320 no . 3_755
H11A H12A 3.5450 no . .
H11A H12B 2.4647 no . .
H11A H12C 2.9400 no . .
H11A H13A 3.5710 no . .
H11A H13C 3.5746 no . .
H11B H12B 3.5469 no . .
H11B H12C 3.5361 no . .
H11B H13A 2.4937 no . .
H11B H13B 3.5632 no . .
H11B H13C 2.9562 no . .
H11C H12A 3.5303 no . .
H11C H12B 2.9185 no . .
H11C H12C 2.4423 no . .
H11C H13A 2.9778 no . .
H11C H13B 3.5706 no . .
H11C H13C 2.5032 no . .
H12A H13A 3.5428 no . .
H12A H13B 2.4551 no . .
H12A H13C 2.9251 no . .
H12B H13B 3.5470 no . .
H12B H13C 3.5530 no . .
H12C H13A 3.5530 no . .
H12C H13B 2.9480 no . .
H12C H13C 2.4693 no . .
H13B H14 3.0617 no . .
H14 H15 2.3285 no . .
H15 H16 2.3656 no . .
H16 H17 2.3366 no . .
H17 H20 2.1798 no . .
H20 H21 2.3369 no . .
H21 H22 2.3336 no . .
H22 H23 2.3612 no . .
H25 H26 2.3224 no . .
H25 H30A 3.3315 no . .
H25 H30B 3.3480 no . .
H25 H30C 2.3582 no . .
H26 H27 2.3558 no . .
H27 H28 2.3333 no . .
H28 H29 2.3010 no . .
H29 H30A 2.7099 no . .
H29 H30B 2.7094 no . .
H29 H30C 3.5989 no . .
O2 H8B 2.9509 no . 4_454
O3 H17 2.6496 no . 3_655
O3 H20 2.6883 no . 3_655
O3 H27 2.5744 no . .
N1 H20 3.3151 no . 3_655
N2 H17 3.2976 no . 3_655
C1 H26 3.1232 no . .
C1 H27 3.4494 no . .
C2 H26 2.9724 no . .
C3 H26 2.8612 no . .
C3 H30A 3.1566 no . 3_756
C3 H30C 3.5041 no . 3_756
C4 H13B 3.4054 no . 4_555
C4 H28 2.9180 no . 1_655
C4 H30A 3.2243 no . 3_756
C5 H14 3.2083 no . 4_555
C5 H15 3.5622 no . 4_555
C5 H28 3.2522 no . 1_655
C6 H15 3.3160 no . 4_555
C6 H30B 3.4269 no . 4_554
C8 H1A 3.2174 no . 2_755
C8 H11B 3.3908 no . 1_655
C8 H14 2.8734 no . 4_555
C8 H23 3.3914 no . 2_755
C8 H28 3.1711 no . 1_655
C9 H20 3.2193 no . 3_655
C9 H27 3.5385 no . .
C11 H8A 3.5561 no . 1_455
C11 H15 3.4450 no . 4_555
C11 H16 3.2303 no . 4_555
C11 H27 3.2495 no . .
C12 H15 3.4445 no . 4_555
C12 H29 3.4042 no . 4_554
C12 H30B 3.2005 no . 4_554
C13 H20 3.3791 no . 3_655
C13 H21 3.0219 no . 3_655
C13 H25 3.1515 no . 4_454
C13 H30A 3.3557 no . 2_655
C14 H8B 3.0451 no . 4_454
C15 H11A 3.4568 no . 4_454
C15 H12B 3.5272 no . 4_454
C15 H21 3.4715 no . 3_655
C16 H11C 3.3139 no . 4_454
C16 H28 3.0056 no . 3_655
C17 H27 3.5146 no . 3_655
C17 H28 3.1323 no . 3_655
C18 H20 3.4472 no . 3_655
C19 H17 3.3864 no . 3_655
C20 H13A 3.0112 no . 3_655
C21 H13A 2.8643 no . 3_655
C21 H25 3.5574 no . 2_645
C22 H16 3.4876 no . 3_655
C23 H16 3.4771 no . 3_655
C24 H13C 2.9489 no . 2_645
C24 H21 3.3456 no . 2_655
C24 H22 3.2255 no . 2_655
C25 H13A 3.5970 no . 4_555
C25 H13C 3.2188 no . 2_645
C25 H21 2.8075 no . 2_655
C25 H22 3.2396 no . 2_655
C25 H25 3.2653 no . 3_756
C25 H30C 3.3074 no . 3_756
C26 H1B 3.0388 no . .
C26 H21 3.2172 no . 2_655
C26 H22 3.1686 no . 2_655
C26 H30C 3.5610 no . 3_756
C27 H1B 3.0008 no . .
C27 H8A 3.4893 no . 1_455
C27 H11A 3.2070 no . .
C27 H11B 3.4622 no . .
C27 H16 3.2056 no . 3_655
C27 H17 3.4479 no . 3_655
C27 H22 3.0565 no . 2_655
C28 H4 3.2275 no . 1_455
C28 H8A 2.8677 no . 1_455
C28 H12C 3.3863 no . 2_645
C28 H16 2.9924 no . 3_655
C28 H17 3.5008 no . 3_655
C28 H22 3.0397 no . 2_655
C29 H4 3.3842 no . 1_455
C29 H8A 3.5667 no . 1_455
C29 H12A 3.3387 no . 4_455
C29 H12C 3.0256 no . 2_645
C29 H13C 3.3516 no . 2_645
C29 H22 3.1265 no . 2_655
C30 H3 2.9042 no . 3_756
C30 H4 3.5700 no . 3_756
C30 H6 3.3278 no . 4_455
C30 H13C 3.2487 no . 2_645
C30 H25 3.3746 no . 3_756
H1A C8 3.2174 no . 2_745
H1A H8B 2.8289 no . 2_745
H1A H8C 2.7274 no . 2_745
H1A H26 3.3946 no . .
H1B C26 3.0388 no . .
H1B C27 3.0008 no . .
H1B H26 2.5447 no . .
H1B H27 2.4782 no . .
H3 C30 2.9042 no . 3_756
H3 H8C 3.5482 no . 2_745
H3 H26 2.8268 no . .
H3 H30A 2.5437 no . 3_756
H3 H30B 3.0087 no . 3_756
H3 H30C 2.6848 no . 3_756
H4 C28 3.2275 no . 1_655
H4 C29 3.3842 no . 1_655
H4 C30 3.5700 no . 3_756
H4 H12A 3.4425 no . 4_555
H4 H13B 2.9173 no . 4_555
H4 H28 2.5259 no . 1_655
H4 H29 2.8543 no . 1_655
H4 H30A 2.6634 no . 3_756
H6 C30 3.3278 no . 4_554
H6 H15 3.3638 no . 4_555
H6 H30B 2.5083 no . 4_554
H6 H30C 3.3361 no . 4_554
H8A C11 3.5561 no . 1_655
H8A C27 3.4893 no . 1_655
H8A C28 2.8677 no . 1_655
H8A C29 3.5667 no . 1_655
H8A H11B 2.7688 no . 1_655
H8A H22 2.9393 no . 2_755
H8A H23 3.2673 no . 2_755
H8A H27 3.5332 no . 1_655
H8A H28 2.4162 no . 1_655
H8B O2 2.9509 no . 4_555
H8B C14 3.0451 no . 4_555
H8B H1A 2.8289 no . 2_755
H8B H13B 3.4880 no . 4_555
H8B H14 2.1528 no . 4_555
H8B H22 3.5993 no . 2_755
H8B H23 2.9423 no . 2_755
H8B H28 3.5905 no . 1_655
H8C H1A 2.7274 no . 2_755
H8C H3 3.5482 no . 2_755
H8C H11B 3.1431 no . 1_655
H8C H14 3.0603 no . 4_555
H8C H23 3.4175 no . 2_755
H8C H30C 3.5769 no . 4_554
H11A C15 3.4568 no . 4_555
H11A C27 3.2070 no . .
H11A H15 2.7658 no . 4_555
H11A H16 3.1322 no . 4_555
H11A H22 3.2359 no . 2_655
H11A H26 3.5184 no . .
H11A H27 2.7468 no . .
H11B C8 3.3908 no . 1_455
H11B C27 3.4622 no . .
H11B H8A 2.7688 no . 1_455
H11B H8C 3.1431 no . 1_455
H11B H17 3.5554 no . 3_655
H11B H20 3.0725 no . 3_655
H11B H22 3.5890 no . 2_655
H11B H27 2.9019 no . .
H11C C16 3.3139 no . 4_555
H11C H15 3.3395 no . 4_555
H11C H16 2.4891 no . 4_555
H12A C29 3.3387 no . 4_554
H12A H4 3.4425 no . 4_454
H12A H29 2.6458 no . 4_554
H12A H30B 2.9781 no . 4_554
H12B C15 3.5272 no . 4_555
H12B H15 2.7543 no . 4_555
H12B H30B 2.8917 no . 4_554
H12C C28 3.3863 no . 2_655
H12C C29 3.0256 no . 2_655
H12C H15 3.3554 no . 4_555
H12C H16 3.1737 no . 4_555
H12C H28 3.4841 no . 2_655
H12C H29 2.8683 no . 2_655
H12C H29 3.3509 no . 4_554
H12C H30A 3.5996 no . 2_655
H12C H30B 3.1965 no . 4_554
H13A C20 3.0112 no . 3_655
H13A C21 2.8643 no . 3_655
H13A C25 3.5970 no . 4_454
H13A H20 2.5261 no . 3_655
H13A H21 2.1839 no . 3_655
H13A H25 2.9070 no . 4_454
H13B C4 3.4054 no . 4_454
H13B H4 2.9173 no . 4_454
H13B H8B 3.4880 no . 4_454
H13B H21 3.1118 no . 3_655
H13B H25 3.2488 no . 4_454
H13B H30A 3.0110 no . 2_655
H13C C24 2.9489 no . 2_655
H13C C25 3.2188 no . 2_655
H13C C29 3.3516 no . 2_655
H13C C30 3.2487 no . 2_655
H13C H21 3.4636 no . 3_655
H13C H25 3.4751 no . 2_655
H13C H25 2.7853 no . 4_454
H13C H30A 2.8008 no . 2_655
H13C H30C 3.4815 no . 2_655
H14 C5 3.2083 no . 4_454
H14 C8 2.8734 no . 4_454
H14 H8B 2.1528 no . 4_454
H14 H8C 3.0603 no . 4_454
H15 C5 3.5622 no . 4_454
H15 C6 3.3160 no . 4_454
H15 C11 3.4450 no . 4_454
H15 C12 3.4445 no . 4_454
H15 H6 3.3638 no . 4_454
H15 H11A 2.7658 no . 4_454
H15 H11C 3.3395 no . 4_454
H15 H12B 2.7543 no . 4_454
H15 H12C 3.3554 no . 4_454
H15 H21 3.5764 no . 3_655
H16 C11 3.2303 no . 4_454
H16 C22 3.4876 no . 3_655
H16 C23 3.4771 no . 3_655
H16 C27 3.2056 no . 3_655
H16 C28 2.9924 no . 3_655
H16 H11A 3.1322 no . 4_454
H16 H11C 2.4891 no . 4_454
H16 H12C 3.1737 no . 4_454
H16 H27 3.0849 no . 3_655
H16 H28 2.6789 no . 3_655
H17 O3 2.6496 no . 3_655
H17 N2 3.2976 no . 3_655
H17 C19 3.3864 no . 3_655
H17 C27 3.4479 no . 3_655
H17 C28 3.5008 no . 3_655
H17 H11B 3.5554 no . 3_655
H17 H27 2.8171 no . 3_655
H17 H28 2.9079 no . 3_655
H20 O3 2.6883 no . 3_655
H20 N1 3.3151 no . 3_655
H20 C9 3.2193 no . 3_655
H20 C13 3.3791 no . 3_655
H20 C18 3.4472 no . 3_655
H20 H11B 3.0725 no . 3_655
H20 H13A 2.5261 no . 3_655
H21 C13 3.0219 no . 3_655
H21 C15 3.4715 no . 3_655
H21 C24 3.3456 no . 2_645
H21 C25 2.8075 no . 2_645
H21 C26 3.2172 no . 2_645
H21 H13A 2.1839 no . 3_655
H21 H13B 3.1118 no . 3_655
H21 H13C 3.4636 no . 3_655
H21 H15 3.5764 no . 3_655
H21 H25 2.7259 no . 2_645
H21 H26 3.4109 no . 2_645
H22 C24 3.2255 no . 2_645
H22 C25 3.2396 no . 2_645
H22 C26 3.1686 no . 2_645
H22 C27 3.0565 no . 2_645
H22 C28 3.0397 no . 2_645
H22 C29 3.1265 no . 2_645
H22 H8A 2.9393 no . 2_745
H22 H8B 3.5993 no . 2_745
H22 H11A 3.2359 no . 2_645
H22 H11B 3.5890 no . 2_645
H22 H27 3.5286 no . 2_645
H22 H28 3.5142 no . 2_645
H23 C8 3.3914 no . 2_745
H23 H8A 3.2673 no . 2_745
H23 H8B 2.9423 no . 2_745
H23 H8C 3.4175 no . 2_745
H25 C13 3.1515 no . 4_555
H25 C21 3.5574 no . 2_655
H25 C25 3.2653 no . 3_756
H25 C30 3.3746 no . 3_756
H25 H13A 2.9070 no . 4_555
H25 H13B 3.2488 no . 4_555
H25 H13C 3.4751 no . 2_645
H25 H13C 2.7853 no . 4_555
H25 H21 2.7259 no . 2_655
H25 H25 2.7064 no . 3_756
H25 H30A 3.3718 no . 3_756
H25 H30C 2.7813 no . 3_756
H26 C1 3.1232 no . .
H26 C2 2.9724 no . .
H26 C3 2.8612 no . .
H26 H1A 3.3946 no . .
H26 H1B 2.5447 no . .
H26 H3 2.8268 no . .
H26 H11A 3.5184 no . .
H26 H21 3.4109 no . 2_655
H26 H30C 3.2732 no . 3_756
H27 O3 2.5744 no . .
H27 C1 3.4494 no . .
H27 C9 3.5385 no . .
H27 C11 3.2495 no . .
H27 C17 3.5146 no . 3_655
H27 H1B 2.4782 no . .
H27 H8A 3.5332 no . 1_455
H27 H11A 2.7468 no . .
H27 H11B 2.9019 no . .
H27 H16 3.0849 no . 3_655
H27 H17 2.8171 no . 3_655
H27 H22 3.5286 no . 2_655
H28 C4 2.9180 no . 1_455
H28 C5 3.2522 no . 1_455
H28 C8 3.1711 no . 1_455
H28 C16 3.0056 no . 3_655
H28 C17 3.1323 no . 3_655
H28 H4 2.5259 no . 1_455
H28 H8A 2.4162 no . 1_455
H28 H8B 3.5905 no . 1_455
H28 H12C 3.4841 no . 2_645
H28 H16 2.6789 no . 3_655
H28 H17 2.9079 no . 3_655
H28 H22 3.5142 no . 2_655
H29 C12 3.4042 no . 4_455
H29 H4 2.8543 no . 1_455
H29 H12A 2.6458 no . 4_455
H29 H12C 2.8683 no . 2_645
H29 H12C 3.3509 no . 4_455
H29 H29 3.4804 no . 3_656
H29 H30A 3.4531 no . 3_656
H30A C3 3.1566 no . 3_756
H30A C4 3.2243 no . 3_756
H30A C13 3.3557 no . 2_645
H30A H3 2.5437 no . 3_756
H30A H4 2.6634 no . 3_756
H30A H12C 3.5996 no . 2_645
H30A H13B 3.0110 no . 2_645
H30A H13C 2.8008 no . 2_645
H30A H25 3.3718 no . 3_756
H30A H29 3.4531 no . 3_656
H30B C6 3.4269 no . 4_455
H30B C12 3.2005 no . 4_455
H30B H3 3.0087 no . 3_756
H30B H6 2.5083 no . 4_455
H30B H12A 2.9781 no . 4_455
H30B H12B 2.8917 no . 4_455
H30B H12C 3.1965 no . 4_455
H30C C3 3.5041 no . 3_756
H30C C25 3.3074 no . 3_756
H30C C26 3.5610 no . 3_756
H30C H3 2.6848 no . 3_756
H30C H6 3.3361 no . 4_455
H30C H8C 3.5769 no . 4_455
H30C H13C 3.4815 no . 2_645
H30C H25 2.7813 no . 3_756
H30C H26 3.2732 no . 3_756

#==============================================================================

#==============================================================================
# Additional structures and associated data_? identifiers
# should be added at this point if there is more than one 
# structure analysis in the CIF.

#==============================================================================
#     End of CIF
#==============================================================================
